# Supplementary material for: Molecular pathogenesis of Spondylocheirodysplastic Ehlers-Danlos syndrome caused by mutant ZIP13 proteins
Source: PubMed Central journal article supplement (PMC4154131; doi:10.15252/emmm.201303809), 2014-07-09

**Figure 2B**

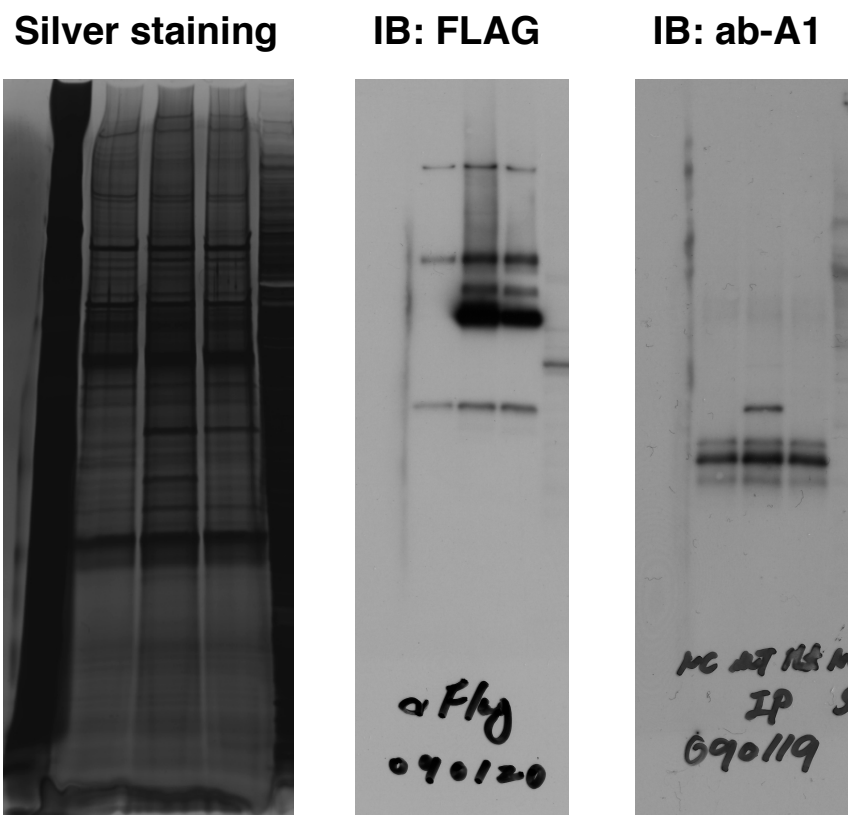

**Figure 2C**

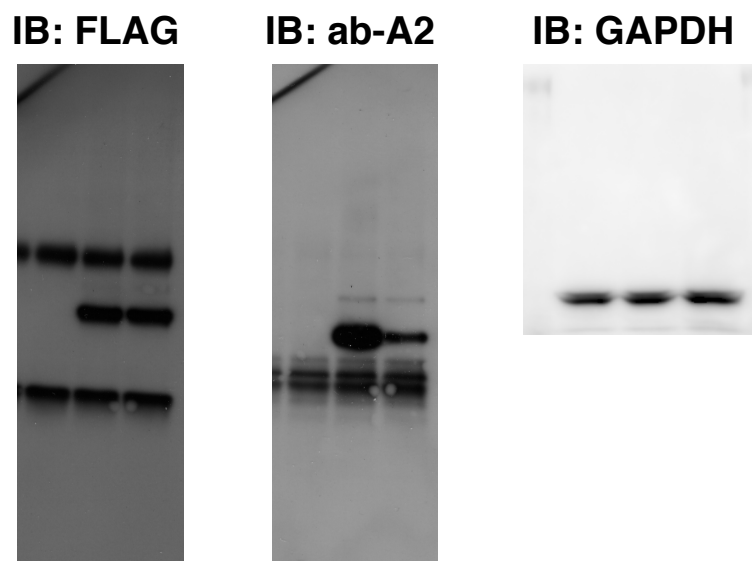

**Figure 2E**

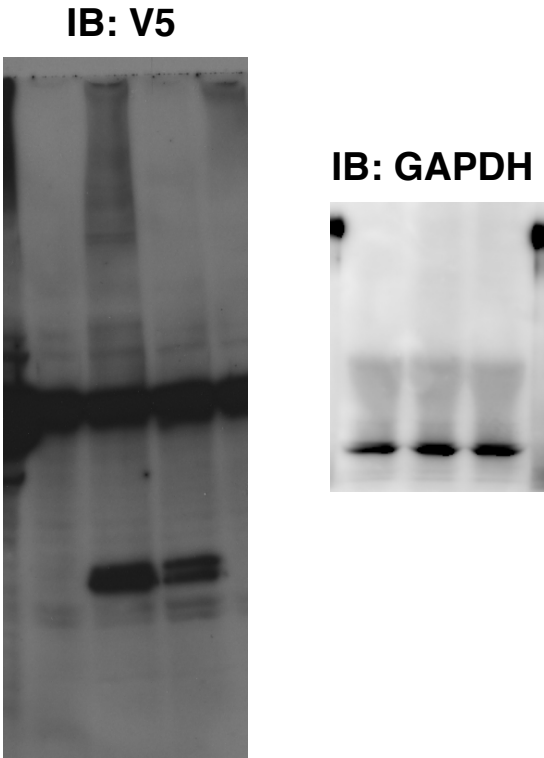

**Figure 2F**

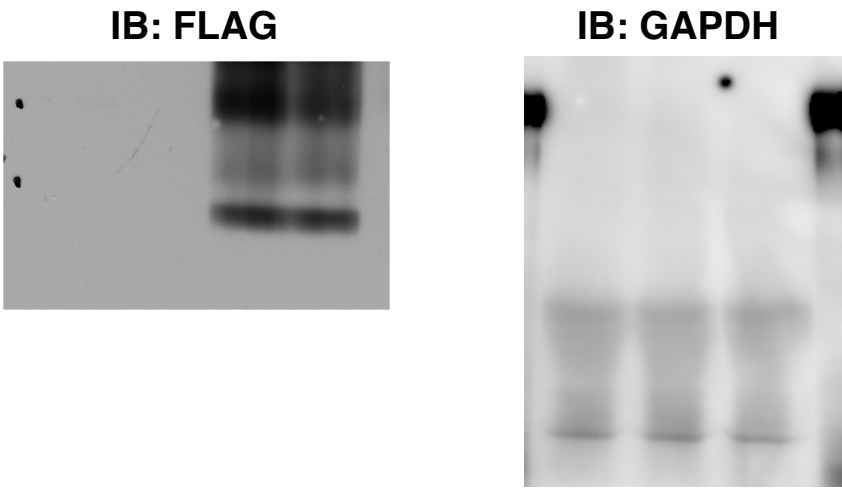

**Figure 2G**

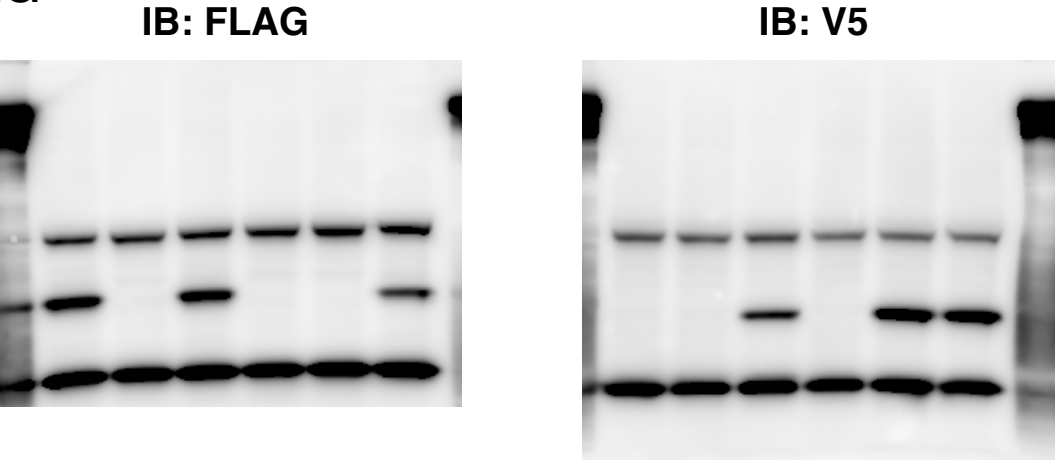

Supplement: emmm0006-1028-sd4.pdf [file emmm0006-1028-sd4.pdf]
