# Supplementary material for: Molecular pathogenesis of Spondylocheirodysplastic Ehlers-Danlos syndrome caused by mutant ZIP13 proteins
Source: PubMed Central journal article supplement (PMC4154131; doi:10.15252/emmm.201303809), 2014-07-09

# Figure 3A

**IB: V5 (NP40-Soluble)**

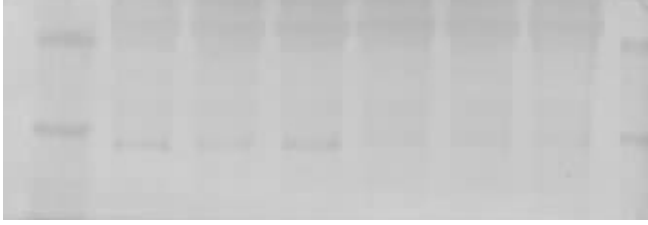

**IB: V5 (NP40-Insoluble)**

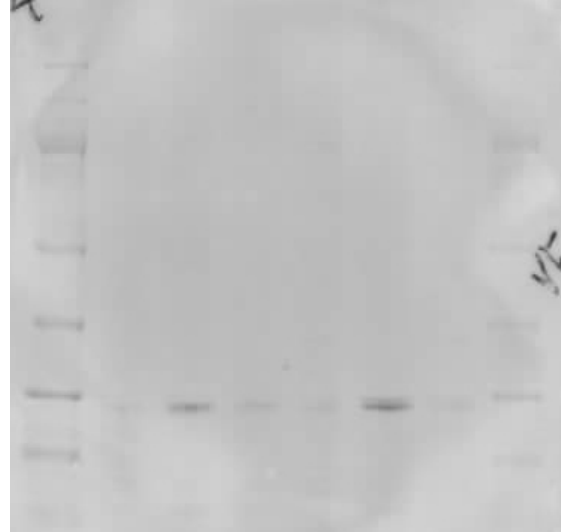

**IB: Ubiquitin (NP40-Soluble)**

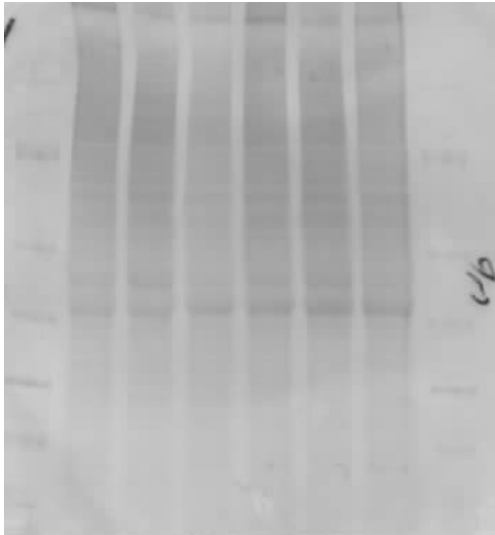

**IB: Ubiquitin (NP40-Insoluble)**

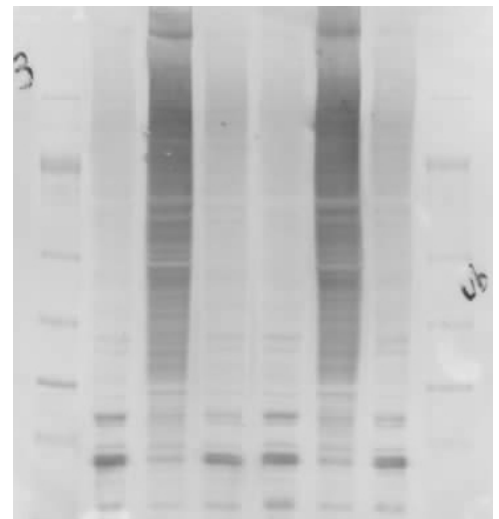

**IB: GAPDH (NP40-Soluble)**

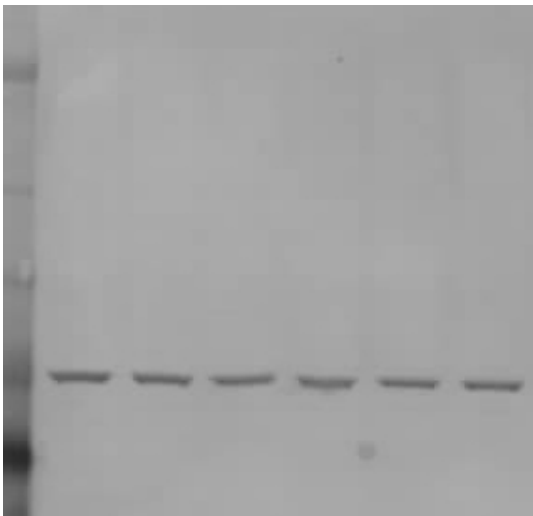

**Figure 3B**

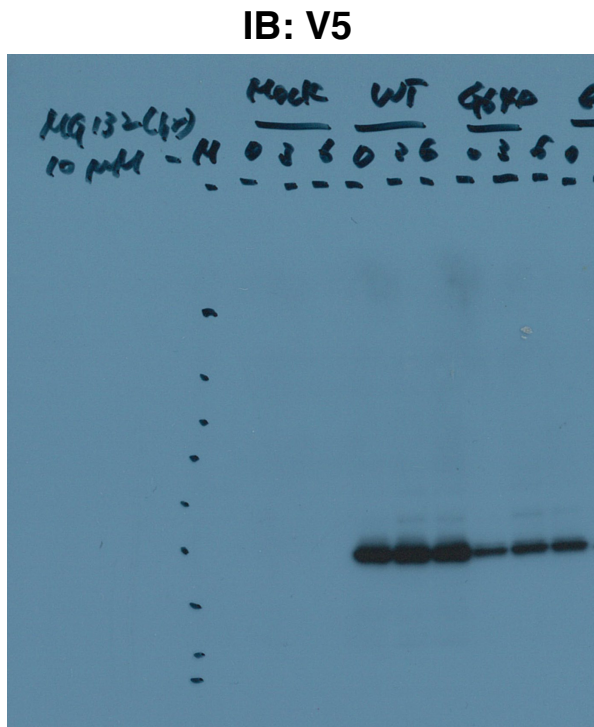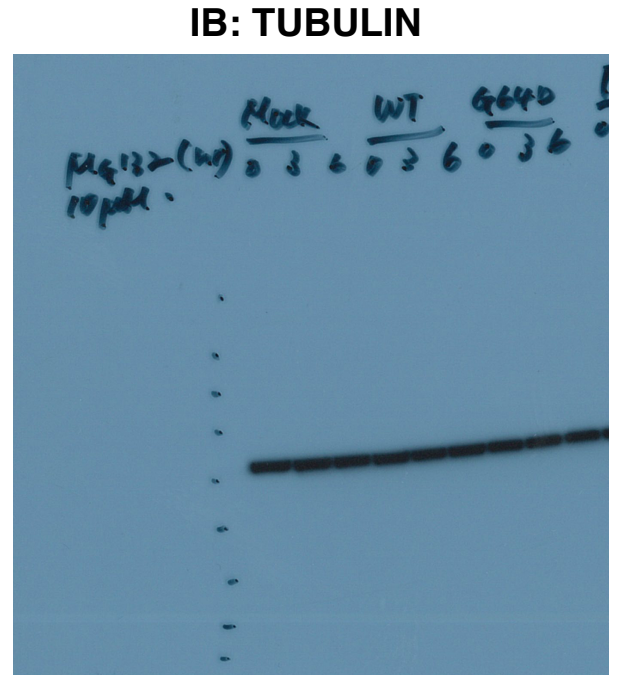

**Figure 3D**

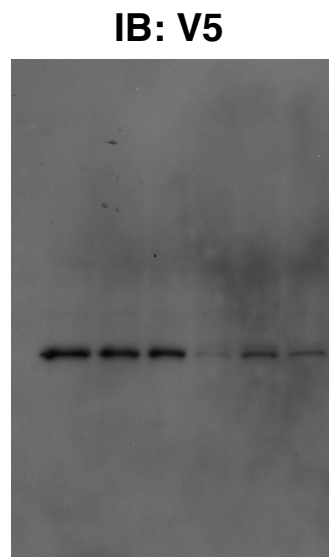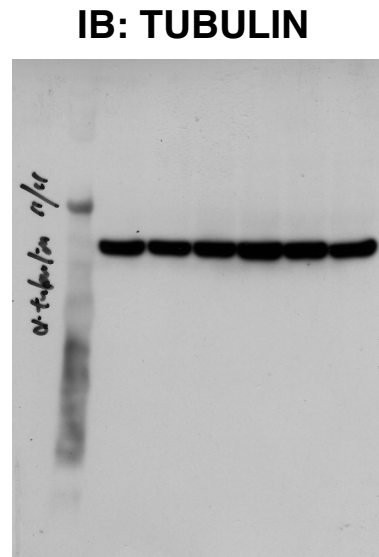

**Figure 3F**

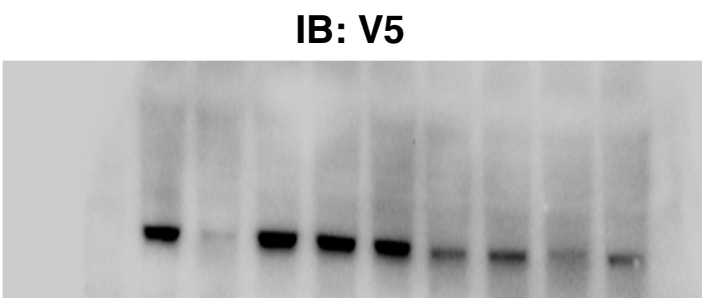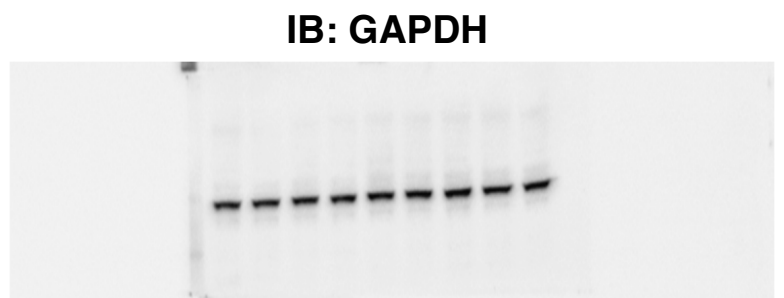

**Figure 3G**

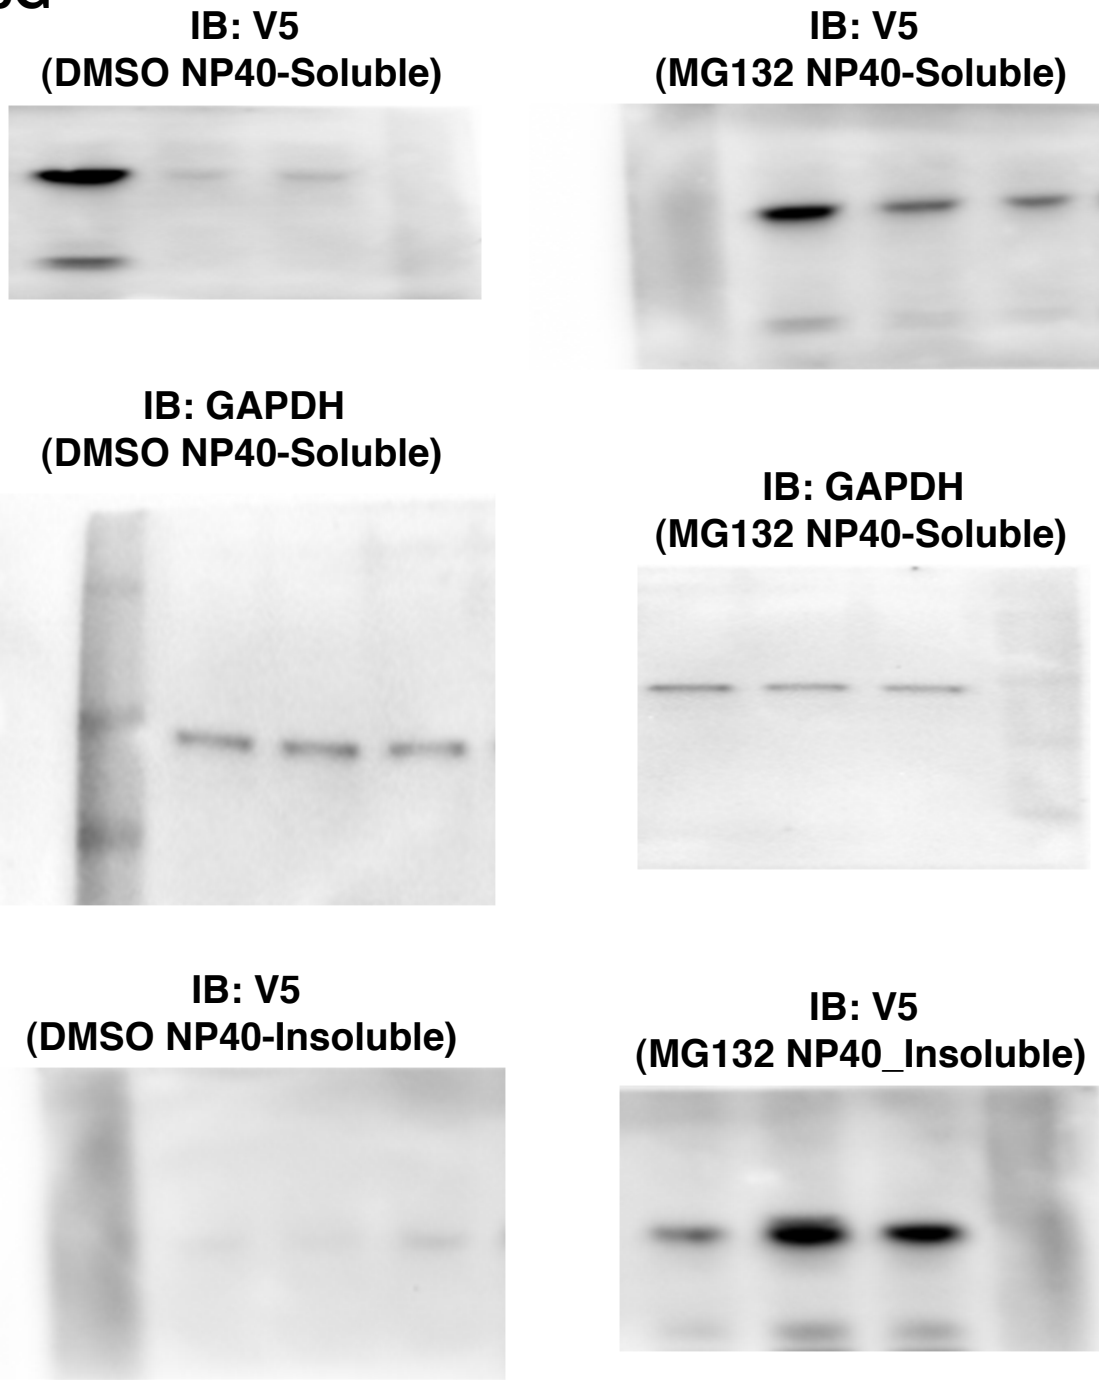

**Figure 3H**

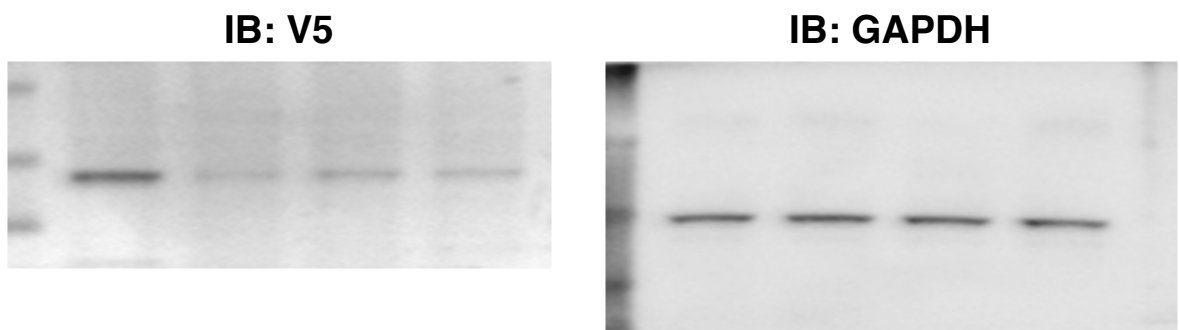

Supplement: emmm0006-1028-sd5.pdf [file emmm0006-1028-sd5.pdf]
