# Supplementary material for: Molecular pathogenesis of Spondylocheirodysplastic Ehlers-Danlos syndrome caused by mutant ZIP13 proteins
Source: PubMed Central journal article supplement (PMC4154131; doi:10.15252/emmm.201303809), 2014-07-09

Figure 5C

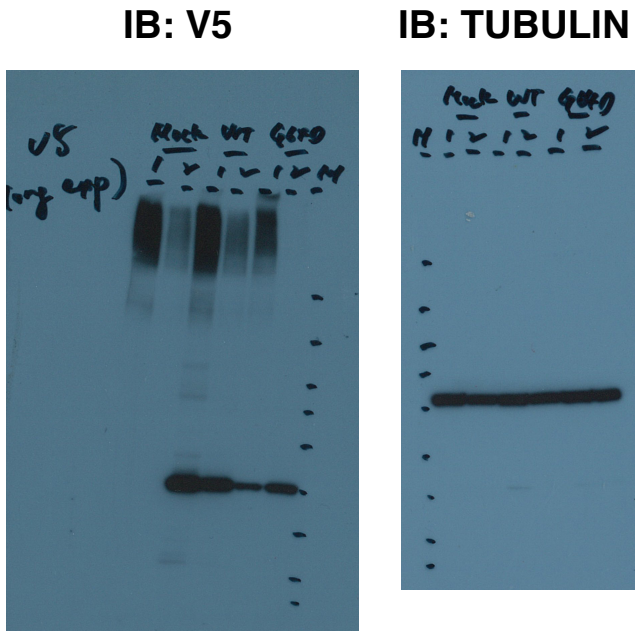

Figure 5D

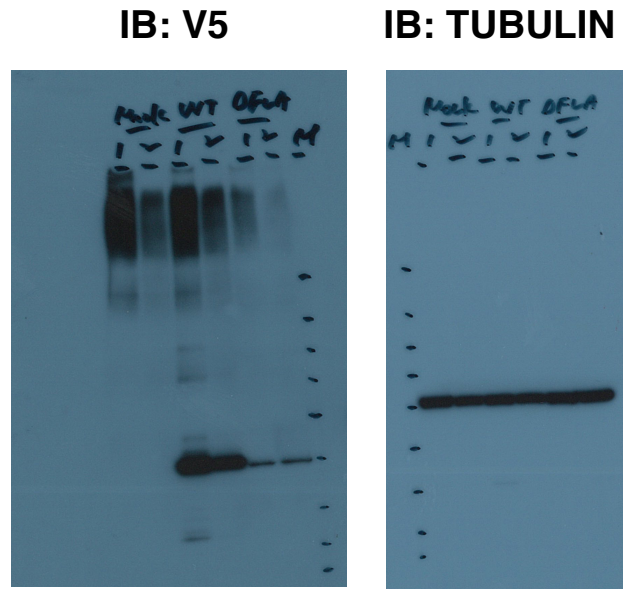

Figure 5F

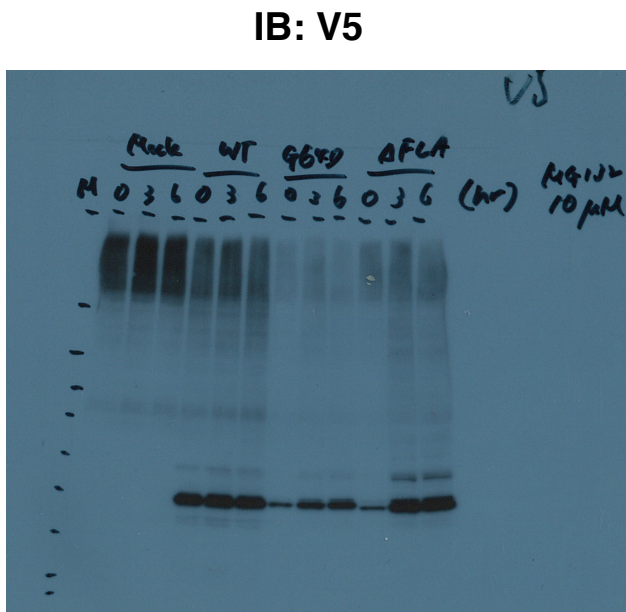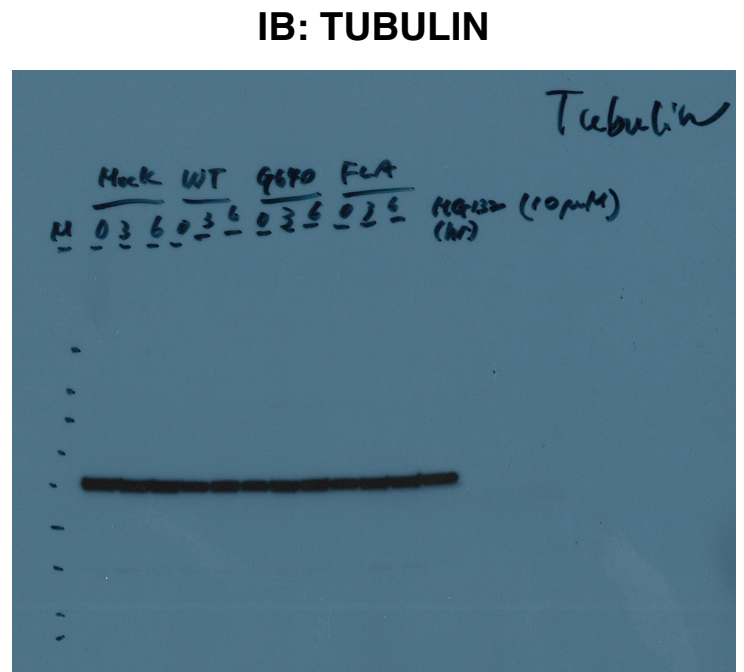

**Figure 5G**

IB: V5

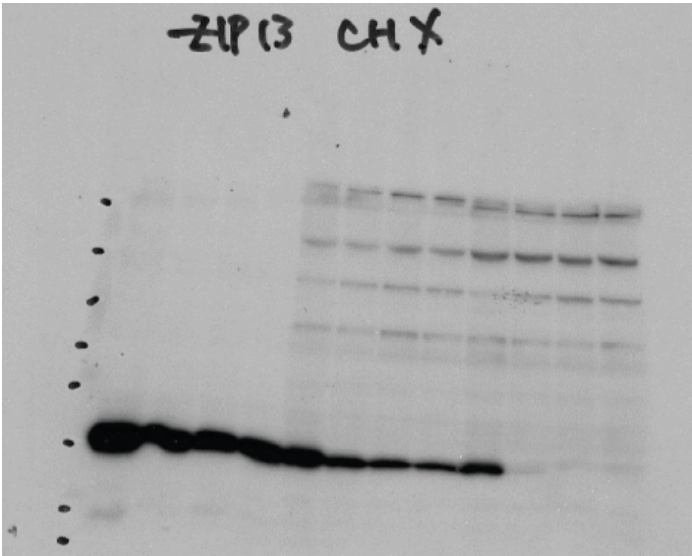

IB: TUBULIN

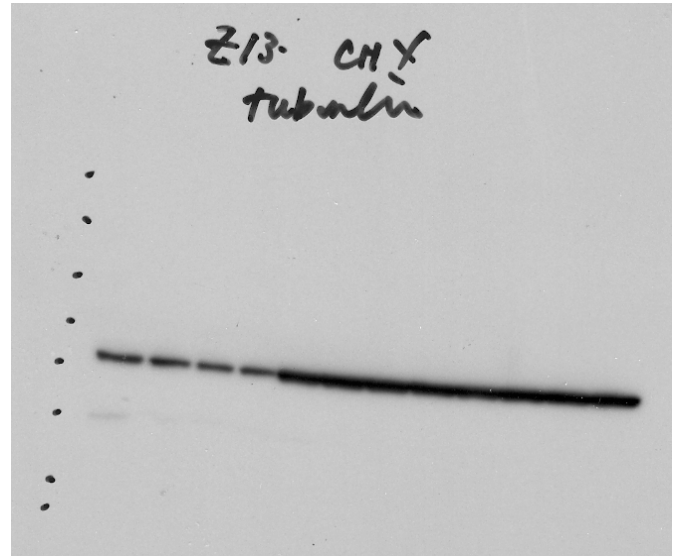

**Figure 5H**

IB: V5

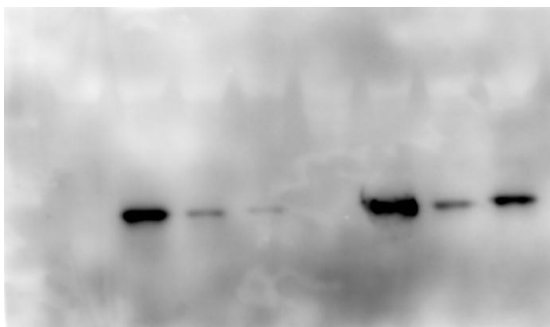

IB: TUBULIN

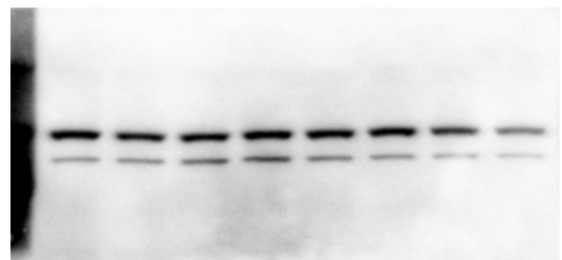

Supplement: emmm0006-1028-sd7.pdf [file emmm0006-1028-sd7.pdf]
