# Supplementary material for: Molecular pathogenesis of Spondylocheirodysplastic Ehlers-Danlos syndrome caused by mutant ZIP13 proteins
Source: PubMed Central journal article supplement (PMC4154131; doi:10.15252/emmm.201303809), 2014-07-09

**Figure 6A**

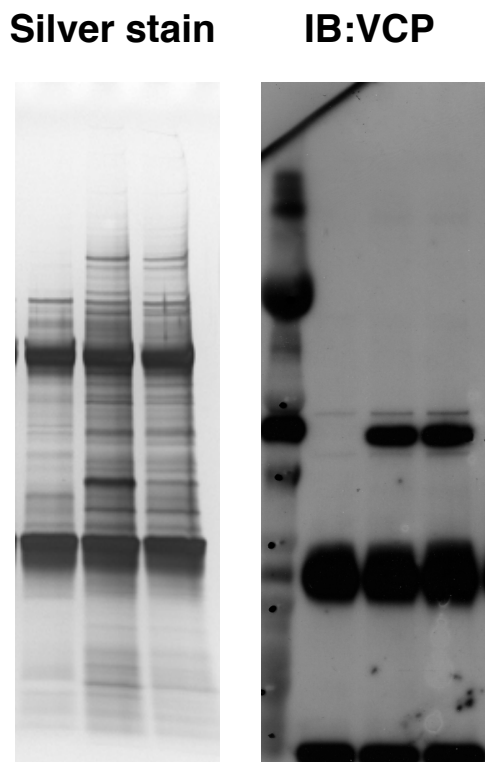

**Figure 6B**

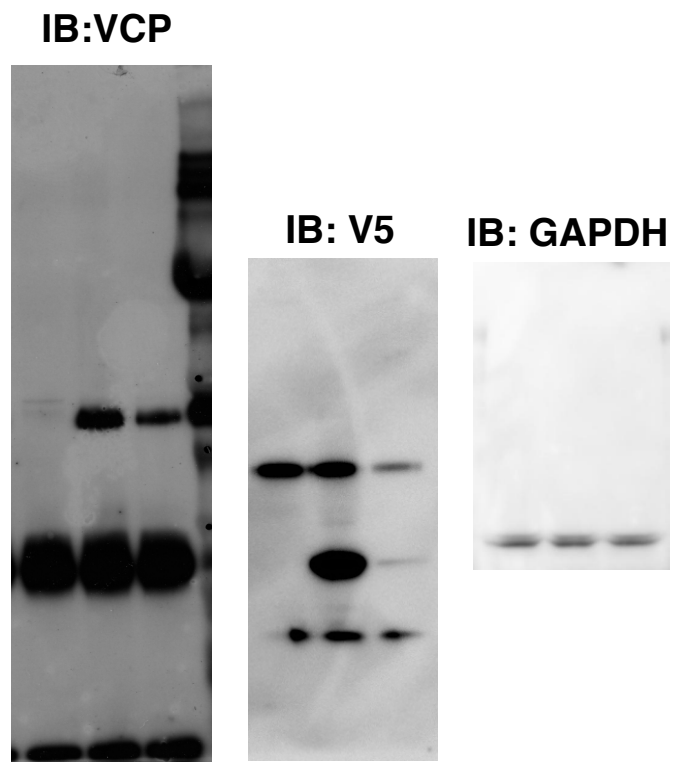

**Figure 6D**

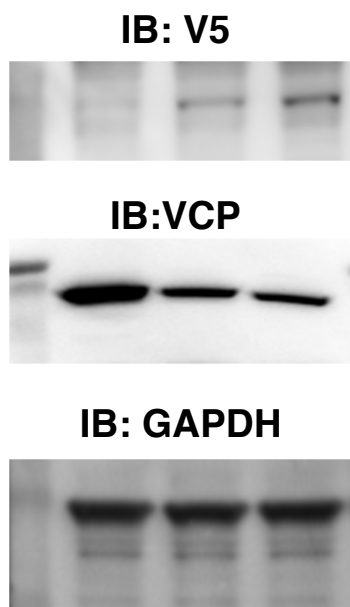

**Figure 6E**

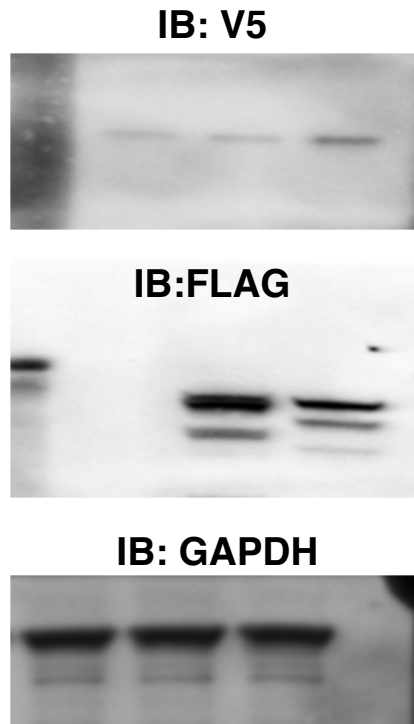

Figure 6F

IB: V5

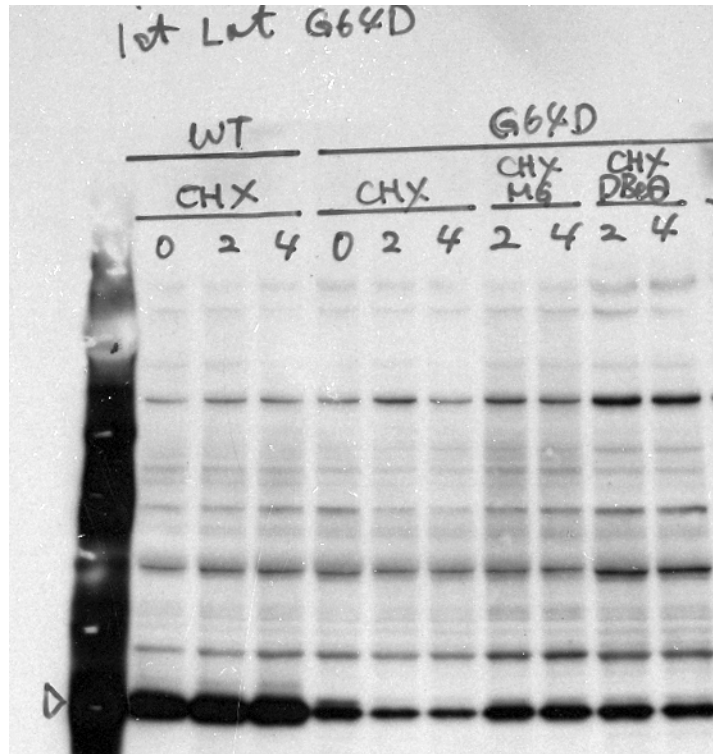

IB: TUBULIN

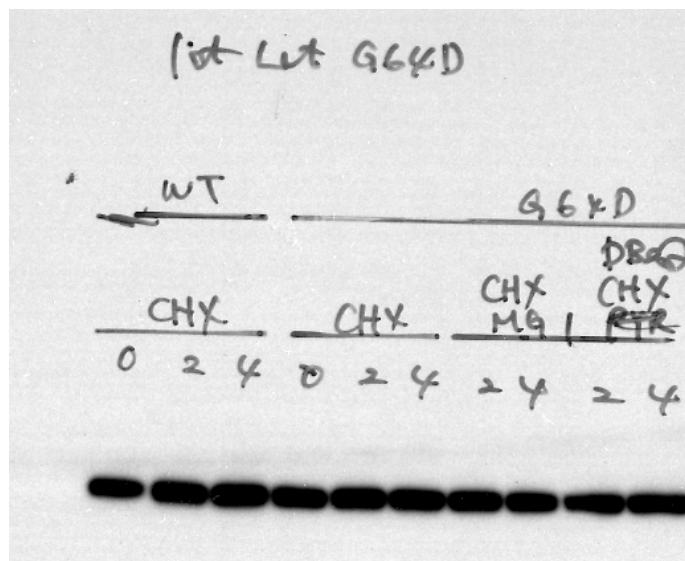

Supplement: emmm0006-1028-sd8.pdf [file emmm0006-1028-sd8.pdf]
